# Supplementary material for: What Internet Services Would Patients Like From Hospitals During an Epidemic? Lessons From the SARS Outbreak in Toronto
Source: J Med Internet Res. 2005 Aug 3;7(4):e46. doi: 10.2196/jmir.7.4.e46 (PMC1550678; doi:10.2196/jmir.7.4.e46)
Supplement: Supplementary file 1 [file jmir_v7i4e46_app1.pdf]

**Centre for Global eHealth Innovation**  
**UHN e1000 Project - Patient Survey 2003**

Patient      Family      Friend      Interviewer: \_\_\_\_\_

Date: DD/MM/YYYY      Clinic you will visit today: \_\_\_\_\_      TGH      TWH      PMH

**Q1. Have you ever heard of the Internet or World Wide Web?**

Yes *(Continue with Q2)*      No *(Skip to Patient Demographics)*

**Q2. Have you ever used the Internet?**

Yes      No

**Q3. Has a family or friend used the Internet on your behalf?**

Yes      No *(Skip to Q5)*      Unsure

**Q4. From where have you, or someone on your behalf, accessed the Internet? *(Check as many as apply)***

At work      At home      At a friend or family member's house  
At hospital or clinic      At the public library      Elsewhere: \_\_\_\_\_

**Q5. Would you be interested to communicate with healthcare professionals using the Internet (e.g., e-mail) as part of your ongoing care, either by yourself or with the help of someone close to you?**

Yes      No      Unsure

**Q6. In the event that the hospital closes clinics or postpones procedures/surgeries during situations like SARS, and if these were available, would you, either by yourself or with the help of someone close to you, use the Internet to access the following: *(Check as many as apply)***

|                                                                         |     |    |        |
|-------------------------------------------------------------------------|-----|----|--------|
| a. Find out the status of your clinic appointment                       | Yes | No | Unsure |
| b. Request a prescription refill                                        | Yes | No | Unsure |
| c. Obtain lab results                                                   | Yes | No | Unsure |
| d. Consult with a hospital health professional about non-urgent matters | Yes | No | Unsure |
| e. Learn about a disease through patient education information          | Yes | No | Unsure |
| f. Send feedback to the hospital about how to improve its services      | Yes | No | Unsure |
| g. Access screening tools                                               | Yes | No | Unsure |
| h. Other <i>(please specify)</i> : _____                                | Yes | No | Unsure |

**Q7. Do you, or does someone close to you, use the Internet to find information about your health?**

Yes      No      Unsure

**Q8. Have you ever shared any of the information found on the Internet with a healthcare provider?**

Yes      No      Unsure

**Q9. Would you be willing to be involved in future projects to improve the use of the Internet in healthcare?**

Yes      No      Unsure

**If you would like to be involved in future projects, please provide your contact information.**

Rest assured that the information provided will be kept confidential and used only by UHN research staff.

**Name:** \_\_\_\_\_ **E-mail:** \_\_\_\_\_

**Address:** \_\_\_\_\_ **Telephone :** (      )      -      \_\_\_\_\_

**Gender:**      M      F      **Age:** <21      21-40      41-60      >60

**Education:** Elementary School      High School      College/Undergraduate      Post-Graduate

**Is English your first language?** Yes      No      **which one?** \_\_\_\_\_

**Were you born in Canada?** Yes      No      **where?** \_\_\_\_\_

# SARS and Internet Survey
