# Supplementary material for: What Internet Services Would Patients Like From Hospitals During an Epidemic? Lessons From the SARS Outbreak in Toronto
Source: J Med Internet Res. 2005 Aug 3;7(4):e46. doi: 10.2196/jmir.7.4.e46 (PMC1550678; doi:10.2196/jmir.7.4.e46)
Supplement: Supplementary file 2 [file jmir_v7i4e46_app2.pdf]

# Multimedia Appendix to Rizo et al.

What Internet Services Would Patients Like From Hospitals During an Epidemic? Lessons From the SARS Outbreak in Toronto.

J Med Internet Res 2005;7(4) <URL: <http://www.jmir.org/2005/4/>>

**Table 3.** Logistic regression—potential services of interest to Internet users surveyed *at entry doors*

| Odds Ratio<br>(95% CI)<br>( <i>P</i> value) |                                                                              |                                                 |                                          |                                          |                                           |                                               |                                              |                                          |
|---------------------------------------------|------------------------------------------------------------------------------|-------------------------------------------------|------------------------------------------|------------------------------------------|-------------------------------------------|-----------------------------------------------|----------------------------------------------|------------------------------------------|
| Variable                                    | Interest in communication with health care professionals using Internet (Q5) | Find out the status of clinic appointment (Q6a) | Request a prescription refill (Q6b)      | Obtain lab results (Q6c)                 | Consulting about non-urgent matters (Q6d) | Learn through patient education program (Q6e) | Send feedback about improving services (Q6f) | Access screening tools (Q6g)             |
| <b>Age</b>                                  |                                                                              |                                                 |                                          |                                          |                                           |                                               |                                              |                                          |
| 40                                          | 3.42<br>(1.20–9.76)<br>( <i>P</i> = .03)                                     | 5.96<br>(1.47–24.04)<br>( <i>P</i> = .31)       | 3.63<br>(1.24–3.62)<br>( <i>P</i> = .15) | NS                                       | 2.59<br>(0.95–7.04)<br>( <i>P</i> = .75)  | 3.75<br>(1.61–12.12)<br>( <i>P</i> = .16)     | 3.85<br>(1.18–12.50)<br>( <i>P</i> = .04)    | 2.01<br>(0.76–5.33)<br>( <i>P</i> = .46) |
| 41–60                                       | 1.77<br>(0.72–4.32)<br>( <i>P</i> = .90)                                     | 8.96<br>(2.27–35.40)<br>( <i>P</i> = .05)       | 3.45<br>(1.35–8.81)<br>( <i>P</i> = .15) | NS                                       | 5.11<br>(1.85–14.07)<br>( <i>P</i> = .01) | 3.20<br>(1.17–8.78)<br>( <i>P</i> = .27)      | 1.77<br>(0.70–4.44)<br>( <i>P</i> = .80)     | 2.23<br>(0.89–5.55)<br>( <i>P</i> = .23) |
| > 60 (RC)                                   | 1                                                                            | 1                                               | 1                                        | 1                                        | 1                                         | 1                                             | 1                                            | 1                                        |
| <b>Education</b>                            |                                                                              |                                                 |                                          |                                          |                                           |                                               |                                              |                                          |
| High school or less (RC)                    | 1                                                                            | 1                                               | 1                                        | 1                                        | 1                                         | 1                                             | 1                                            | 1                                        |
| College/University                          | 2.84<br>(1.29–6.25)<br>( <i>P</i> = .009)                                    | NS                                              | NS                                       | NS                                       | 2.69<br>(1.12–6.46)<br>( <i>P</i> = .02)  | NS                                            | NS                                           | NS                                       |
| <b>English First Language</b>               |                                                                              |                                                 |                                          |                                          |                                           |                                               |                                              |                                          |
| No (RC)                                     | 1                                                                            | 1                                               | 1                                        | 1                                        | 1                                         | 1                                             | 1                                            | 1                                        |
| Yes                                         | NS                                                                           | NS                                              | NS                                       | NS                                       | NS                                        | NS                                            | NS                                           | NS                                       |
| <b>Gender</b>                               |                                                                              |                                                 |                                          |                                          |                                           |                                               |                                              |                                          |
| Female (RC)                                 | 1                                                                            | 1                                               | 1                                        | 1                                        | 1                                         | 1                                             | 1                                            | 1                                        |
| Male                                        | 0.59<br>(0.27–1.26)<br>( <i>P</i> = .17)                                     | NS                                              | NS                                       | 0.34<br>(0.14–0.78)<br>( <i>P</i> = .01) | NS                                        | NS                                            | NS                                           | NS                                       |
| <b>Born in Canada</b>                       |                                                                              |                                                 |                                          |                                          |                                           |                                               |                                              |                                          |
| No (RC)                                     | 1                                                                            | 1                                               | 1                                        | 1                                        | 1                                         | 1                                             | 1                                            | 1                                        |
| Yes                                         | NS                                                                           | NS                                              | NS                                       | NS                                       | NS                                        | NS                                            | NS                                           | NS                                       |

RC = reference category; NS = nonsignificant *P* values that did not show up in the final model

**Table 4.** Logistic regression–potential services of interest to Internet users surveyed *at clinics*

| Odds Ratio<br>(95% CI)<br>( <i>P</i> value) |                                                                             |                                                 |                                           |                                           |                                           |                                               |                                              |                                          |
|---------------------------------------------|-----------------------------------------------------------------------------|-------------------------------------------------|-------------------------------------------|-------------------------------------------|-------------------------------------------|-----------------------------------------------|----------------------------------------------|------------------------------------------|
| Variable                                    | Interest in communication with healthcare professionals using Internet (Q5) | Find out the status of clinic appointment (Q6a) | Request a prescription refill (Q6b)       | Obtain lab results (Q6c)                  | Consulting about non-urgent matters (Q6d) | Learn through patient education program (Q6e) | Send feedback about improving services (Q6f) | Access screening tools (Q6g)             |
| <b>Age</b>                                  |                                                                             |                                                 |                                           |                                           |                                           |                                               |                                              |                                          |
| 40                                          | NS                                                                          | 1.97<br>(1.00–3.86)<br>( <i>P</i> = .06)        | 1.93<br>(1.02–3.64)<br>( <i>P</i> = .054) | 2.30<br>(1.21–4.35)<br>( <i>P</i> = .053) | 1.77<br>(0.96–3.23)<br>( <i>P</i> = .20)  | 1.99<br>(0.99–3.97)<br>( <i>P</i> = .23)      | 2.38<br>(1.26–4.49)<br>( <i>P</i> = .01)     | 2.21<br>(1.17–4.18)<br>( <i>P</i> = .14) |
| 41–60                                       | NS                                                                          | 1.46<br>(0.76–2.80)<br>( <i>P</i> = .87)        | 1.47<br>(0.79–2.74)<br>( <i>P</i> = .79)  | 2.05<br>(1.09–3.88)<br>( <i>P</i> = .21)  | 1.74<br>(0.95–3.18)<br>( <i>P</i> = .24)  | 1.94<br>(0.97–3.88)<br>( <i>P</i> = .19)      | 1.69<br>(0.91–3.14)<br>( <i>P</i> = .68)     | 2.33<br>(1.23–4.42)<br>( <i>P</i> = .07) |
| > 60 (RC)                                   | 1                                                                           | 1                                               | 1                                         | 1                                         | 1                                         | 1                                             | 1                                            | 1                                        |
| <b>Education</b>                            |                                                                             |                                                 |                                           |                                           |                                           |                                               |                                              |                                          |
| High school or less (RC)                    | 1                                                                           | 1                                               | 1                                         | 1                                         | 1                                         | 1                                             | 1                                            | 1                                        |
| College/University                          | 1.47<br>(0.94–2.29)<br>( <i>P</i> = .09)                                    | 1.86<br>(1.14–3.03)<br>( <i>P</i> = .01)        | 2.43<br>(1.56–3.79)<br>( <i>P</i> < .001) | 2.40<br>(1.51–3.80)<br>( <i>P</i> < .001) | 1.41<br>(0.90–2.20)<br>( <i>P</i> = .12)  | 1.61<br>(0.96–2.71)<br>( <i>P</i> = .06)      | 1.60<br>(1.01–2.55)<br>( <i>P</i> = .045)    | 1.32<br>(0.81–2.14)<br>( <i>P</i> = .25) |
| <b>English First Language</b>               |                                                                             |                                                 |                                           |                                           |                                           |                                               |                                              |                                          |
| No (RC)                                     | 1                                                                           | 1                                               | 1                                         | 1                                         | 1                                         | 1                                             | 1                                            | 1                                        |
| Yes                                         | 1.77<br>(0.89–3.51)<br>( <i>P</i> = .09)                                    | 2.46<br>(1.32–4.57)<br>( <i>P</i> = .004)       | 2.72<br>(1.26–5.85)<br>( <i>P</i> = .01)  | 4.08<br>(1.86–8.92)<br>( <i>P</i> < .001) | 1.90<br>(1.05–3.43)<br>( <i>P</i> = .03)  | 1.89<br>(0.96–3.72)<br>( <i>P</i> = .06)      | 2.65<br>(1.46–4.78)<br>( <i>P</i> = .001)    | 2.14<br>(1.15–3.98)<br>( <i>P</i> = .01) |
| <b>Gender</b>                               |                                                                             |                                                 |                                           |                                           |                                           |                                               |                                              |                                          |
| Female (RC)                                 | 1                                                                           | 1                                               | 1                                         | 1                                         | 1                                         | 1                                             | 1                                            | 1                                        |
| Male                                        | NS                                                                          | NS                                              | NS                                        | 1.40<br>(0.88–2.22)<br>( <i>P</i> = .14)  | NS                                        | NS                                            | NS                                           | NS                                       |
| <b>Born in Canada</b>                       |                                                                             |                                                 |                                           |                                           |                                           |                                               |                                              |                                          |
| No (RC)                                     | 1                                                                           | 1                                               | 1                                         | 1                                         | 1                                         | 1                                             | 1                                            | 1                                        |
| Yes                                         | 1.55<br>(0.89–2.70)<br>( <i>P</i> = .11)                                    | NS                                              | 0.58<br>(0.31–1.11)<br>( <i>P</i> = .10)  | 0.55<br>(0.28–1.08)<br>( <i>P</i> = .08)  | NS                                        | NS                                            | NS                                           | NS                                       |

RC = reference category; NS = nonsignificant *P* values that did not show up in the final model
